# Supplementary material
Source: PubMed Central journal article supplement (PMC4487888)
Supplement: NIHMS690924-supplement-Appendix_Figures.pdf [file NIHMS690924-supplement-Appendix_Figures.pdf]

## $\beta$ distribution (real number form)

Formula:  $f(x) = x^{(a-1)} (1-x)^{(b-1)} \frac{\Gamma(a+b)}{\Gamma(a)\Gamma(b)}$

Domain:  $0 < x < 1$

Parameters:  $a > 0, b > 0$

Details:  $Mean = \frac{a}{(a+b)}$

The parameters  $a$  and  $b$  can be approximated from a mean  $\mu$  and SD  $\sigma$ :

$$a = \mu \left( \frac{\mu(1-\mu)}{\sigma^2} - 1 \right)$$

$$b = (1-\mu) \left( \frac{\mu(1-\mu)}{\sigma^2} - 1 \right)$$

**Appendix Figure 1. Formula used to approximate  $a$  and  $b$  on the basis of mean and SD for [beta]-distribution function for probabilistic sensitivity analysis (from TreeAge Pro).**

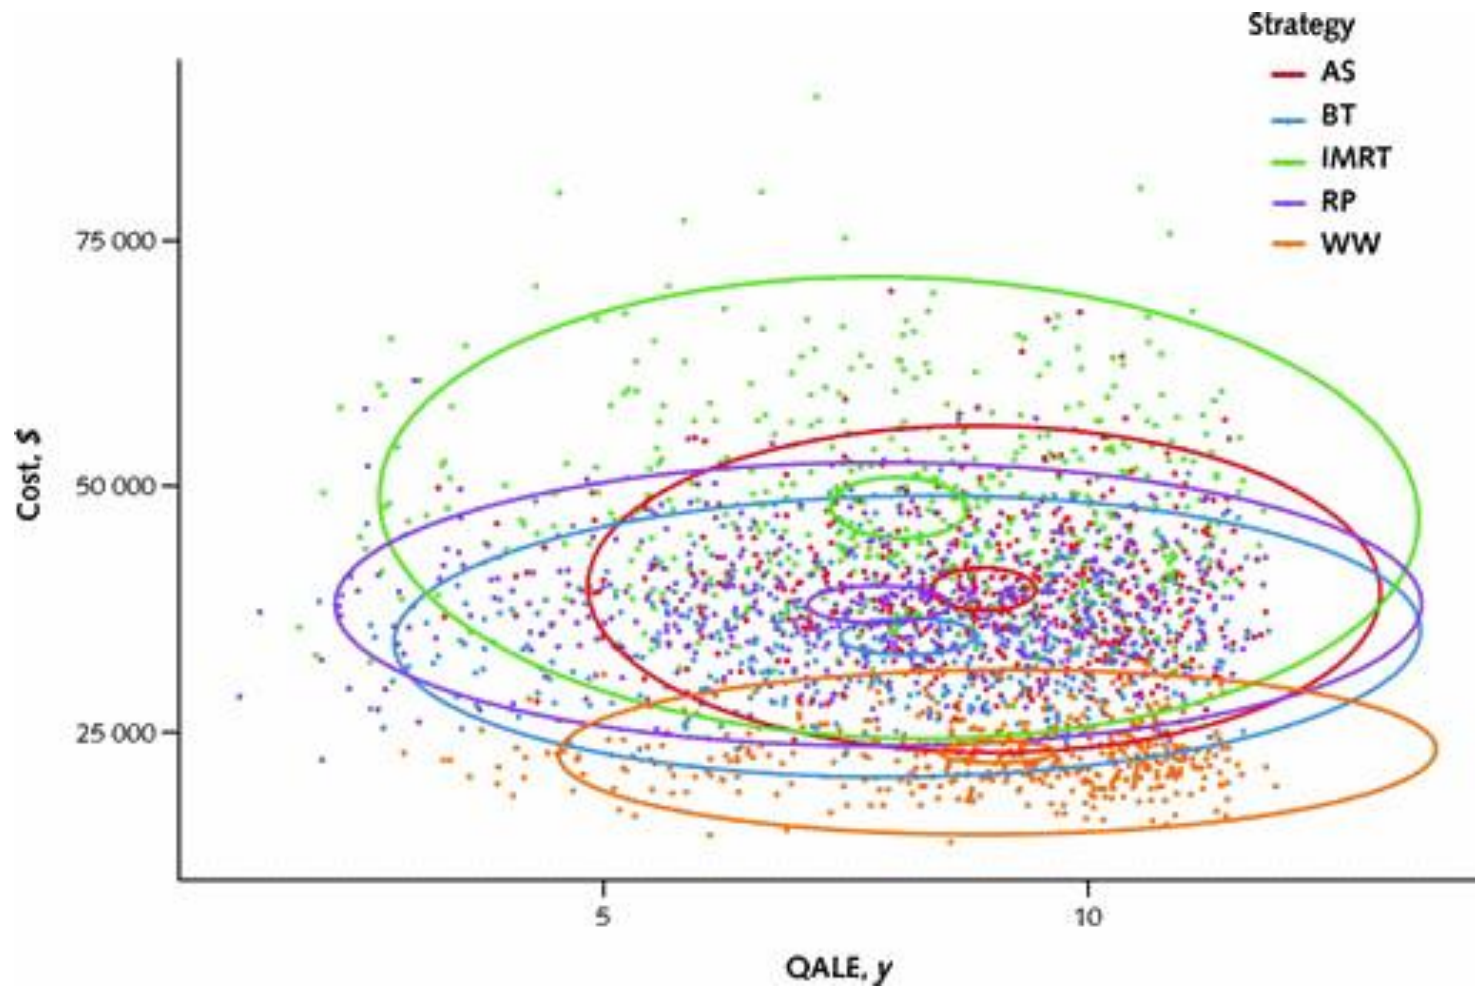

**Appendix Figure 2. Probabilistic sensitivity analysis of costs (in U.S. dollars) and effectiveness (QALE, in years) for men aged 65 years.** Ellipses represent 95% CIs for each strategy. AS = active surveillance; BT = brachytherapy; IMRT = intensity-modulated radiation therapy; QALE = quality-adjusted life expectancy; RP = radical prostatectomy; WW = watchful waiting.

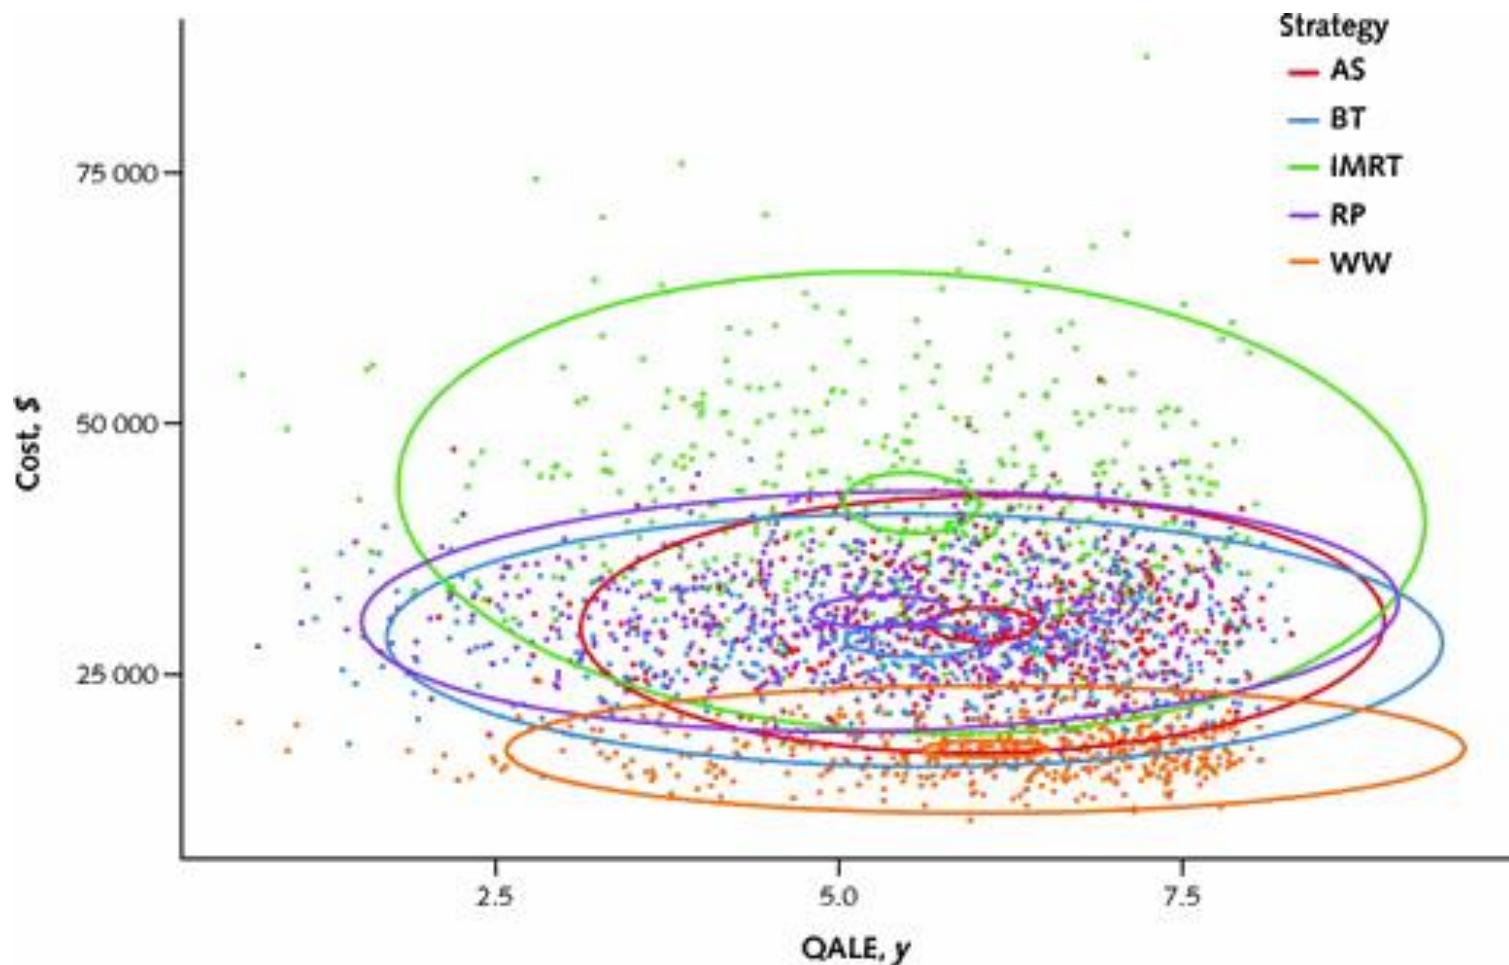

**Appendix Figure 3. Probabilistic sensitivity analysis of costs (in U.S. dollars) and effectiveness (QALE, in years) for men aged 75 years.** Ellipses represent 95% CIs for each strategy. AS = active surveillance; BT = brachytherapy; IMRT = intensity-modulated radiation therapy; QALE = quality-adjusted life expectancy; RP = radical prostatectomy; WW = watchful waiting.
